# Supplementary material for: Patterns of expansion and expression divergence in the plant polygalacturonase gene family
Source: PubMed Central journal article supplement (PMC1794546; doi:10.1186/gb-2006-7-9-r87), 2006-09-29
Supplement: gb-2006-7-9-r87-S1.pdf [file gb-2006-7-9-r87-S1.pdf]

**SUPPLEMENT A. List of polygalacturonases identified from GenBank protein records except *Arabidopsis* proteins**

These entries are sorted according to their taxa: BA, eubacteria; F, fungi; ME, metazoans; PL, plants. Number of PGases refers to the number of glycosyl hydrolase family 28 domains predicted by Pfam and SMART. Note column: \*, redundant entries (also colored yellow); D, deprecated entries that GenBank deleted in current release; P, partial sequence that is not included in the alignments.

| Accession | GI       | Taxa | Note | Species name                                    | Gene name | PGase # | Annotation                                   |
|-----------|----------|------|------|-------------------------------------------------|-----------|---------|----------------------------------------------|
| P27644    | 129937   | BA   |      | <i>Agrobacterium tumefaciens</i>                | N.A.      | 1       | POLYGALACTURONASE                            |
| AAG60962  | 12620686 | BA   |      | <i>Bradyrhizobium japonicum</i>                 | id636     | 1       | ID636                                        |
| AAB46984  | 1839180  | BA   |      | <i>Burkholderia cepacia</i>                     | pehA      | 2       | polygalacturonase                            |
| P18192    | 129933   | BA   |      | <i>Erwinia carotovora</i>                       | Peh1      | 1       | ENDO-POLYGALACTURONASE PRECURSOR             |
| P26509    | 129936   | BA   |      | <i>Erwinia carotovora</i>                       | PehA      | 1       | ENDO-POLYGALACTURONASE PRECURSOR             |
| 3891426   | 3891426  | BA   |      | <i>Erwinia carotovora subsp. carotovora</i>     | N.A.      | 1       | N.A.                                         |
| P15922    | 129749   | BA   |      | <i>Erwinia chrysanthemi</i>                     | N.A.      | 1       | EXO-POLY-ALPHA-D-GALACTURONOSIDASE PRECURSOR |
| AAF70169  | 7804881  | BA   |      | <i>Leptosphaeria maculans</i>                   | pg1       | 1       | endopolygalacturonase PG1                    |
| BAA74431  | 4185608  | BA   |      | <i>Pectobacterium carotovorum</i>               | peh       | 1       | Peh                                          |
| AAA03624  | 148472   | BA   | *    | <i>Pectobacterium carotovorum</i>               | peh1      | 1       | poly galacturonase                           |
| AAA57139  | 476012   | BA   | *    | <i>Pectobacterium carotovorum</i>               | peh-1     | 1       | endopolygalacturonase                        |
| JC1219    | 95574    | BA   |      | <i>Pectobacterium carotovorum</i>               | N.A.      | 1       | polygalacturonase precursor                  |
| CAB99318  | 9437305  | BA   |      | <i>Pectobacterium chrysanthemi</i>              | pehV      | 1       | polygalacturonase                            |
| CAB99319  | 9437306  | BA   |      | <i>Pectobacterium chrysanthemi</i>              | pehW      | 1       | polygalacturonase                            |
| CAB99320  | 9437307  | BA   |      | <i>Pectobacterium chrysanthemi</i>              | pehX      | 1       | exo-poly -a-D- galacturonosidase             |
| P20041    | 129942   | BA   |      | <i>Ralstonia solanacearum</i>                   | N.A.      | 1       | POLYGALACTURONASE PRECURSOR                  |
| AAB51699  | 1621469  | BA   |      | <i>Rhizobium vitis</i>                          | pehA      | 1       | endo-polygalacturonase                       |
| S72635    | 7435342  | BA   |      | <i>Thermoanaerobacterium thermosulfurigenes</i> | N.A.      | 1       | exo-poly -alpha- galacturonosidase precursor |
| H72376    | 7462768  | BA   |      | <i>Thermotoga maritima</i>                      | N.A.      | 1       | hypothetical protein TM0437                  |
| AAC15064  | 3089553  | BA   |      | <i>Yersinia enterocolitica</i>                  | N.A.      | 1       | exopolygalacturonase                         |
| BAB32924  | 13160919 | F    |      | <i>Alternaria alternata</i>                     | aapg-1    | 1       | endopolygalacturonase                        |
| BAB32923  | 13160913 | F    |      | <i>Alternaria citri</i>                         | acpg-1    | 1       | endopolygalacturonase                        |
| AAC23565  | 3220207  | F    |      | <i>Aspergillus aculeatus</i>                    | pga1      | 1       | polygalacturonase                            |
| A55415    | 1078617  | F    |      | <i>Aspergillus aculeatus</i>                    | rhgA      | 1       | rhamnogalacturonase A precursor              |
| Q00001    | 2499718  | F    | *    | <i>Aspergillus aculeatus</i>                    | rhgA      | 1       | RHAMNOGALACTURONASE A PRECURSOR              |
| 2981975   | 2981975  | F    | *    | <i>Aspergillus aculeatus</i>                    | N.A.      | 1       | N.A.                                         |
| P41749    | 1172461  | F    |      | <i>Aspergillus flavus</i>                       | N.A.      | 1       | POLYGALACTURONASE A PRECURSOR                |
| P41750    | 1172462  | F    |      | <i>Aspergillus flavus</i>                       | N.A.      | 1       | POLYGALACTURONASE B PRECURSOR                |
| P26213    | 129932   | F    |      | <i>Aspergillus niger</i>                        | PG1       | 1       | POLYGALACTURONASE I PRECURSOR                |
| P26214    | 129934   | F    |      | <i>Aspergillus niger</i>                        | PG2       | 1       | POLYGALACTURONASE II PRECURSOR               |
| Q12554    | 3024382  | F    |      | <i>Aspergillus niger</i>                        | PG3       | 1       | POLYGALACTURONASE III PRECURSOR              |
| CAB72125  | 6911543  | F    |      | <i>Aspergillus niger</i>                        | pgaA      | 1       | endo-polygalacturonase A                     |
| CAB72126  | 6911545  | F    |      | <i>Aspergillus niger</i>                        | pgaB      | 1       | endo-polygalacturonase B                     |
| CAB72931  | 6967121  | F    |      | <i>Aspergillus niger</i>                        | pgaD      | 1       | endo-polygalacturonase D                     |
| CAA74744  | 2909341  | F    |      | <i>Aspergillus niger</i>                        | pgaE      | 1       | endopolygalacturonase                        |
| CAA63911  | 2117031  | F    |      | <i>Aspergillus niger</i>                        | rhgA      | 2       | rhamnogalacturonase                          |
| CAA63912  | 2117033  | F    |      | <i>Aspergillus niger</i>                        | rhgB      | 1       | rhamnogalacturonase                          |
| BAA95407  | 7707787  | F    |      | <i>Aspergillus niger awamorii</i>               | pgx2      | 1       | polygalacturonase -X2                        |
| BAA95408  | 7707789  | F    |      | <i>Aspergillus niger awamorii</i>               | ppas      | 1       | protopectinase-AS                            |
| BAA34782  | 3970835  | F    |      | <i>Aspergillus oryzae</i>                       | pgaB      | 1       | polygalacturonase B                          |
| P35335    | 548489   | F    |      | <i>Aspergillus oryzae</i>                       | N.A.      | 1       | POLYGALACTURONASE PRECURSOR                  |
| P49575    | 1346703  | F    |      | <i>Aspergillus parasiticus</i>                  | N.A.      | 1       | POLYGALACTURONASE PRECURSOR                  |

|           |          |   |                                                      |         |   |                                                      |
|-----------|----------|---|------------------------------------------------------|---------|---|------------------------------------------------------|
| P19805    | 129935   | F | <i>Aspergillus_tubingensis</i>                       | N.A.    | 1 | POLYGALACTURONASE II PRECURSOR                       |
| Q00293    | 2499716  | F | <i>Aspergillus_tubingensis</i>                       | N.A.    | 1 | EXOPOLYGALACTURONASE PRECURSOR                       |
| S74208    | 7514890  | F | <i>Aspergillus_tubingensis</i>                       | N.A.    | 1 | galacturan 1,4-alpha-galacturonidase precursor       |
| CAB65657  | 6686870  | F | <i>Aspergillus_tubingensis</i>                       | xghA    | 1 | endo-xylogalacturonan hydrolase                      |
| AAC64374  | 3282213  | F | <i>Botryotinia_fuckeliana</i>                        | BcPGA1  | 1 | endopolygalacturonase 1                              |
| AAC24950  | 3282215  | F | <i>Botryotinia_fuckeliana</i>                        | BcPGA2  | 1 | endopolygalacturonase 2                              |
| AAC24952  | 3282218  | F | <i>Botryotinia_fuckeliana</i>                        | BcPGA3  | 1 | endopolygalacturonase 3                              |
| AAC24953  | 3282222  | F | <i>Botryotinia_fuckeliana</i>                        | BcPGA4  | 1 | endopolygalacturonase 4                              |
| AAC24955  | 3282226  | F | <i>Botryotinia_fuckeliana</i>                        | BcPGA5  | 1 | endopolygalacturonase 5                              |
| AAC24956  | 3282228  | F | <i>Botryotinia_fuckeliana</i>                        | BcPGA6  | 1 | endopolygalacturonase 6                              |
| AAF05088  | 6175595  | F | <i>Botryotinia_fuckeliana</i>                        | PGX     | 1 | exo-polygalacturonase                                |
| AAB61358  | 2199504  | F | <i>Botryotinia_fuckeliana</i>                        | N.A.    | 1 | rhamnogalacturonan hydrolase                         |
| AAF68401  | 7716491  | F | <i>Chondrostereum_purpureum</i>                      | epgA    | 1 | endopolygalacturonase                                |
| AAF68402  | 7716493  | F | <i>Chondrostereum_purpureum</i>                      | epgB    | 1 | endopolygalacturonase                                |
| AAK29433  | 13540363 | F | <i>Chondrostereum_purpureum</i>                      | epgB2   | 1 | endopolygalacturonase                                |
| AAF68404  | 7716497  | F | <i>Chondrostereum_purpureum</i>                      | epgD    | 1 | endopolygalacturonase                                |
| JC5462    | 7514829  | F | <i>Chondrostereum_purpureum</i>                      | N.A.    | 1 | endopolygalacturonase I precursor                    |
| CAA71246  | 1752653  | F | <i>Claviceps_purpurea</i>                            | pg1     | 1 | polygalacturonase                                    |
| CAA71247  | 1752654  | F | <i>Claviceps_purpurea</i>                            | pg2     | 1 | polygalacturonase                                    |
| P26215    | 129938   | F | <i>Cochliobolus_carbonum</i>                         | N.A.    | 1 | POLYGALACTURONASE PRECURSOR                          |
| Q00359    | 2499717  | F | <i>Cochliobolus_carbonum</i>                         | N.A.    | 1 | EXOPOLYGALACTURONASE PRECURSOR                       |
| CAC14022  | 10933620 | F | <i>Colletotrichum_gloeosporioides_f._sp._malvae</i>  | PG2     | 1 | endopolygalacturonase                                |
| Q00446    | 2499715  | F | <i>Colletotrichum_lindemuthianum</i>                 | pg1     | 1 | ENDOPOLYGALACTURONASE I PRECURSOR                    |
| CAA64727  | 2230787  | F | <i>Colletotrichum_lindemuthianum</i>                 | pg2     | 1 | endopolygalacturonase                                |
| AAB36616  | 1208810  | F | <i>Cryphonectria_parasitica</i>                      | enpg-1  | 1 | endopolygalacturonase                                |
| JC2498    | 1076242  | F | <i>Cryptomeria_japonica</i>                          | cry_j_2 | 1 | second major allergen Cry j II precursor<br>POSSIBLE |
| P43212    | 1171004  | F | <i>Cryptomeria_japonica</i>                          | N.A.    | 1 | POLYGALACTURONASE PRECURSOR                          |
| BAA20555  | 2217913  | F | <i>Fusarium_oxysporum</i>                            | N.A.    | 1 | endopolygalacturonase                                |
| AAC05015  | 2078555  | F | <i>Fusarium_oxysporum_f._sp._lycopersici</i>         | PG1     | 1 | endopolygalacturonase                                |
| AAC32604  | 3450879  | F | <i>Fusarium_oxysporum_f._sp._lycopersici</i>         | pgx1    | 1 | exopolygalacturonase                                 |
| AAC27792  | 3348099  | F | <i>Fusarium_oxysporum_f._sp._lycopersici</i>         | N.A.    | 1 | endopolygalacturonase                                |
| AAF12737  | 13378332 | F | <i>Fusarium_oxysporum_f._sp._radicis-lycopersici</i> | pg1     | 1 | exopolygalacturonase                                 |
| BAA20427  | 2196457  | F | <i>Geotrichum_klebahnii</i>                          | PSE3    | 1 | protopectinases SE3                                  |
| AAG34307  | 11323212 | F | <i>Gibberella_circinata</i>                          | fcpg    | 1 | endopolygalacturonase                                |
| Q07181    | 585668   | F | <i>Gibberella_fujikuroi</i>                          | N.A.    | 1 | POLYGALACTURONASE PRECURSOR                          |
| CAA03900  | 2597957  | F | <i>Khuyveromyces_marxianus</i>                       | epg1    | 1 | endopolygalacturonase                                |
| AAC05833  | 2967835  | F | <i>Ophiostoma_novo-ulmi</i>                          | pg      | 1 | polygalacturonase                                    |
| Q9Y718    | 7388011  | F | <i>Penicillium_digitatum</i>                         | N.A.    | 1 | POLYGALACTURONASE PRECURSOR                          |
| O59925    | 7388004  | F | <i>Penicillium_expansum</i>                          | N.A.    | 1 | POLYGALACTURONASE PRECURSOR                          |
| AAF06810  | 6289088  | F | <i>Penicillium_griseoroseum</i>                      | pggI    | 1 | polygalacturonase                                    |
| AAF03895  | 6110608  | F | <i>Penicillium_griseoroseum</i>                      | pggII   | 1 | polygalacturonase                                    |
| O93883    | 7388007  | F | <i>Penicillium_griseoroseum</i>                      | N.A.    | 1 | POLYGALACTURONASE PRECURSOR                          |
| O42824    | 7388002  | F | <i>Penicillium_janthinellum</i>                      | N.A.    | 1 | POLYGALACTURONASE PRECURSOR                          |
| Q9Y833    | 7388012  | F | <i>Penicillium_olsonii</i>                           | N.A.    | 1 | POLYGALACTURONASE 2 PRECURSOR                        |
| Q9Y834    | 7388013  | F | <i>Penicillium_olsonii</i>                           | N.A.    | 1 | POLYGALACTURONASE 1 PRECURSOR                        |
| NP_012687 | 6322613  | F | <i>Saccharomyces_cerevisiae</i>                      | PGU1    | 1 | Endo-polygalacturonase                               |
| S62742    | 2133329  | F | <i>Sclerotinia_sclerotiorum</i>                      | PG2     | 1 | endopolygalacturonase 2 precursor                    |
| S62743    | 2133330  | F | <i>Sclerotinia_sclerotiorum</i>                      | PG3     | 1 | endopolygalacturonase 3 precursor                    |
| CAA74019  | 2196886  | F | <i>Sclerotinia_sclerotiorum</i>                      | pg5     | 1 | endopolygalacturonase                                |
| Q12708    | 3024383  | F | <i>Sclerotinia_sclerotiorum</i>                      | N.A.    | 1 | ENDO-POLYGALACTURONASE PRECURSOR                     |

|          |          |    |                                  |           |   |                                                    |
|----------|----------|----|----------------------------------|-----------|---|----------------------------------------------------|
| AAG35693 | 11493894 | ME | <i>Sitophilus_oryzae</i>         | N.A.      | 1 | endopolygalacturonase                              |
| AAM28240 | 21628922 | ME | <i>Meloidogyne incognita</i>     | MiPG1     | 1 | polygalacturonase                                  |
| CAA76930 | 4210806  | ME | <i>Phaedon cochleariae</i>       | N.A.      | 1 | polygalacturonase                                  |
| AAF71154 | 7959971  | PL | <i>Actinidia_chinensis</i>       | PGA       | 1 | polygalacturonase A                                |
| AAF71155 | 7959973  | PL | <i>Actinidia_chinensis</i>       | PGA       | 1 | polygalacturonase A                                |
| AAF71160 | 7959983  | PL | <i>Actinidia_chinensis</i>       | PGA       | 1 | polygalacturonase A                                |
| AAF71156 | 7959975  | PL | <i>Actinidia_chinensis</i>       | PGB       | 1 | polygalacturonase B                                |
| AAF71158 | 7959979  | PL | <i>Actinidia_chinensis</i>       | PGC       | 1 | polygalacturonase C                                |
| AAF71159 | 7959981  | PL | * <i>Actinidia_chinensis</i>     | PGC       | 1 | polygalacturonase C                                |
| P35336   | 548488   | PL | <i>Actinidia_chinensis</i>       | N.A.      | 1 | POLYGALACTURONASE PRECURSOR                        |
| CAA90272 | 1419408  | PL | <i>Brassica_napus</i>            | PGA/SAC66 | 1 | Polygalacturonase                                  |
| CAC05657 | 9967518  | PL | <i>Brassica_napus</i>            | PGAZ      | 1 | endopolygalacturonase                              |
| P35337   | 548490   | PL | <i>Brassica_napus</i>            | N.A.      | 1 | POLYGALACTURONASE PRECURSOR                        |
| CAA65072 | 1212786  | PL | <i>Brassica_napus</i>            | RDPG1     | 1 | polygalacturonase                                  |
| X98373   | 1403141  | PL | * <i>Brassica_napus</i>          | RDPG1     | 1 | endo-polygalacturonidase                           |
| JC7100   | 7520823  | PL | <i>Chamaecyparis_obtusa</i>      | Cha_o_2   | 1 | polygalacturonase Cha o 2                          |
| T08203   | 7435389  | PL | <i>Cucumis_melo</i>              | MPG1?     | 1 | polygalacturonase precursor                        |
| T08213   | 7435390  | PL | <i>Cucumis_melo</i>              | MPG2?     | 1 | polygalacturonase precursor                        |
| T08215   | 7435383  | PL | <i>Cucumis_melo</i>              | MPG3      | 1 | polygalacturonase 3 precursor                      |
| BAA88472 | 6624205  | PL | <i>Cucumis_sativus</i>           | CUPG1     | 1 | polygalacturonase                                  |
| AAD46483 | 5669846  | PL | <i>Glycine_max</i>               | PG1       | 1 | polygalacturonase PG1                              |
| AAD46484 | 5669848  | PL | <i>Glycine_max</i>               | PG2       | 1 | polygalacturonase PG2                              |
| Q39766   | 3024385  | PL | <i>Gossypium_barbadense</i>      | N.A.      | 1 | POLYGALACTURONASE PRECURSOR                        |
| Q39786   | 3024386  | PL | <i>Gossypium_hirsutum</i>        | N.A.      | 1 | POLYGALACTURONASE PRECURSOR                        |
| CAC05582 | 9955725  | PL | <i>Juniperus_ashei</i>           | jna2      | 1 | pollen major allergen 2 protein                    |
| P05117   | 129939   | PL | <i>Lycopersicon_esculentum</i>   | PG2A      | 1 | POLYGALACTURONASE 2A PRECURSOR                     |
| AAC70951 | 3834451  | PL | <i>Lycopersicon_esculentum</i>   | PG7       | 1 | polygalacturonase 7                                |
| AAC28903 | 2459811  | PL | <i>Lycopersicon_esculentum</i>   | TAPG1     | 1 | polygalacturonase 1                                |
| AAB09575 | 1575705  | PL | <i>Lycopersicon_esculentum</i>   | TAPG2     | 1 | abscission polygalacturonase                       |
| T04319   | 7435391  | PL | <i>Lycopersicon_esculentum</i>   | TAPG3     | 1 | polygalacturonase TAPG3                            |
| T04320   | 7435392  | PL | * <i>Lycopersicon_esculentum</i> | TAPG4     | 1 | polygalacturonase TAPG4                            |
| T07591   | 7435388  | PL | <i>Lycopersicon_esculentum</i>   | TAPG4     | 1 | polygalacturonase TAPG4 precursor                  |
| T04322   | 7435393  | PL | <i>Lycopersicon_esculentum</i>   | TAPG5     | 1 | polygalacturonase TAPG5                            |
| 225933   | 225933   | PL | * <i>Lycopersicon_esculentum</i> | PG2A      | 1 | N.A.                                               |
| AAD17250 | 4325090  | PL | <i>Lycopersicon_esculentum</i>   | N.A.      | 1 | polygalacturonase                                  |
| S57806   | 1362096  | PL | * <i>Lycopersicon_esculentum</i> | TAPG1     | 1 | polygalacturonase precursor                        |
| T05906   | 7435394  | PL | <i>Lycopersicon_esculentum</i>   | N.A.      | 1 | probable polygalacturonase                         |
| AAF61444 | 7381227  | PL | <i>Lycopersicon_esculentum</i>   | XOPG1     | 1 | polygalacturonase                                  |
| P48978   | 1346704  | PL | <i>Malus_domestica</i>           | N.A.      | 1 | POLYGALACTURONASE PRECURSOR                        |
| T09654   | 7435398  | PL | <i>Medicago_sativa</i>           | PG3       | 1 | polygalacturonase PG3 precursor                    |
| Q40312   | 3024387  | PL | <i>Medicago_sativa</i>           | N.A.      | 1 | POLYGALACTURONASE PRECURSOR                        |
| AAG14416 | 10185719 | PL | <i>Nicotiana_tabacum</i>         | NTS1      | 1 | NTS1 protein                                       |
| S32006   | 322765   | PL | D <i>Nicotiana_tabacum</i>       | N.A.      | 1 | polygalacturonase                                  |
| S32008   | 322767   | PL | * <i>Nicotiana_tabacum</i>       | N.A.      | 1 | polygalacturonase                                  |
| S32010   | 322769   | PL | * <i>Nicotiana_tabacum</i>       | N.A.      | 1 | polygalacturonase                                  |
| Q05967   | 548491   | PL | * <i>Nicotiana_tabacum</i>       | N.A.      | 1 | POLYGALACTURONASE PRECURSOR                        |
| S46533   | 1084423  | PL | * <i>Nicotiana_tabacum</i>       | N.A.      | 1 | polygalacturonase precursor (clone G27.1.1  G27.2) |
| P24548   | 129941   | PL | <i>Oenothera_organensis</i>      | N.A.      | 1 | EXOPOLYGALACTURONASE                               |
| AAA32914 | 166951   | PL | <i>Persea_americana</i>          | N.A.      | 1 | polygalacturonase                                  |
| Q02096   | 400758   | PL | * <i>Persea_americana</i>        | N.A.      | 1 | POLYGALACTURONASE PRECURSOR                        |
| S31195   | 419745   | PL | * <i>Persea_americana</i>        | N.A.      | 1 | polygalacturonase                                  |

|          |          |    |   |                          |           |   |                                              |
|----------|----------|----|---|--------------------------|-----------|---|----------------------------------------------|
| AAD02559 | 4105806  | PL | P | <i>Petunia_x_hybrida</i> | PGPS/NH19 | 1 | PGPS/NH19                                    |
| CAB42886 | 4826572  | PL |   | <i>Phleum_pratense</i>   | pg        | 1 | polygalacturonase                            |
| AAK50769 | 13958032 | PL |   | <i>Pisum_sativum</i>     | Ppg1      | 2 | polygalacturonase                            |
| P48979   | 1346705  | PL |   | <i>Prunus_persica</i>    | N.A.      | 1 | POLYGALACTURONASE<br>PRECURSOR               |
| S71524   | 2147957  | PL | D | <i>Prunus_persica</i>    | N.A.      | 1 | polygalacturonase                            |
| AAC64184 | 3747093  | PL |   | <i>Prunus_persica</i>    | N.A.      | 1 | endopolygalacturonase                        |
| S71523   | 2147956  | PL |   | <i>Prunus_persica</i>    | N.A.      | 1 | polygalacturonase [similarity]               |
| CAA11846 | 3164119  | PL |   | <i>Rubus_ideaus</i>      | RAS3      | 1 | polygalacturonase                            |
| BAA89476 | 6714524  | PL |   | <i>Salix_gilgiana</i>    | SgPG1     | 1 | polygalacturonase                            |
| BAA89477 | 6714526  | PL |   | <i>Salix_gilgiana</i>    | SgPG2     | 1 | polygalacturonase                            |
| BAA89478 | 6714528  | PL |   | <i>Salix_gilgiana</i>    | SgPG3     | 1 | polygalacturonase                            |
| BAA89479 | 6714530  | PL |   | <i>Salix_gilgiana</i>    | SgPG4     | 1 | polygalacturonase                            |
| CAA40910 | 22422    | PL | * | <i>Zea_mays</i>          | PG1       | 1 | polygalacturonase                            |
| CAA40803 | 22424    | PL | * | <i>Zea_mays</i>          | PG1       | 1 | polygalacturonase                            |
| P26216   | 129940   | PL |   | <i>Zea_mays</i>          | N.A.      | 1 | EXOPOLYGALACTURONASE<br>PRECURSOR            |
| P35338   | 548492   | PL | * | <i>Zea_mays</i>          | N.A.      | 1 | EXOPOLYGALACTURONASE<br>PRECURSOR            |
| P35339   | 548493   | PL |   | <i>Zea_mays</i>          | N.A.      | 1 | EXOPOLYGALACTURONASE<br>PRECURSOR            |
| S16998   | 100912   | PL | * | <i>Zea_mays</i>          | N.A.      | 1 | polygalacturonase                            |
| CAA40851 | 1360705  | PL | * | <i>Zea_mays</i>          | N.A.      | 1 | polygalacturonase                            |
| S25824   | 283049   | PL | * | <i>Zea_mays</i>          | N.A.      | 1 | polygalacturonase precursor (clone<br>W2247) |
| S25825   | 283050   | PL | * | <i>Zea_mays</i>          | N.A.      | 1 | polygalacturonase precursor (clone<br>W2265) |
| S30064   | 629852   | PL | * | <i>Zea_mays</i>          | N.A.      | 1 | polygalacturonase                            |
| BAB20805 | 12082296 | PL |   | <i>Zinnia_elegans</i>    | ZePG1     | 1 | polygalacturonase                            |
