# Supplementary material for: Patterns of expansion and expression divergence in the plant polygalacturonase gene family
Source: PubMed Central journal article supplement (PMC1794546; doi:10.1186/gb-2006-7-9-r87), 2006-09-29
Supplement: gb-2006-7-9-r87-S2.pdf [file gb-2006-7-9-r87-S2.pdf]

## SUPPLEMENT B. Assignment of PGs to duplicated blocks

I. BWH blocks assignment – BWH block names used in Figure 3 correspond to the original names (BWH names) obtained from [http://wolfe.gen.tcd.ie/athal/all\\_results](http://wolfe.gen.tcd.ie/athal/all_results) [45]. Among the Arabidopsis PGs, 12 (shaded) are assigned as duplicated genes by Blanc et al. (2003). The rest of the PGs are assigned to BWH blocks if they are flanked by assigned duplicates.

| Gene name | AGI block | BWH block | BWH names      |
|-----------|-----------|-----------|----------------|
| At2g15450 |           | 24a       | R_204067704020 |
| At2g15470 |           | 24a       | R_204067704020 |
| At2g15460 |           | 24a       | R_204067704020 |
| At2g26620 |           | 24e       | R_204153002470 |
| At4g13760 | 34a2      | 34a       | R_304185103260 |
| At2g40310 | 23a2      | 23a       | R_203257711080 |
| At1g43080 |           |           |                |
| At1g43090 |           |           |                |
| At1g43100 |           |           |                |
| At1g17150 |           | 11b       | R_101123907580 |
| At1g78400 |           |           |                |
| At2g33160 | 12a2      | 12a       | R_102031203980 |
| At4g18180 | 45a2      | 45a       | R_405128403640 |
| At1g02790 | 14a1      | 14a       | R_104000102440 |
| At3g14040 | 13b2      | 13b       | R_103352501880 |
| At3g07850 |           | 35w       | R_305052001580 |
| At5g48140 |           | 35v       | R_305052001580 |
| At3g07830 |           | 35w       | R_305052001580 |
| At3g07820 |           | 35w       | R_305052001580 |
| At3g07840 |           | 35w       | R_305052001580 |
| At2g43870 | 23a2      | 23a       | R_203257711080 |
| At3g59850 | 23a1      | 23a       | R_203257711080 |
| At2g43860 | 23a2      | 23a       | R_203257711080 |
| At1g65570 |           |           |                |
| At2g43880 | 23a2      | 23a       | R_203257711080 |
| At2g43890 | 23a2      | 23a       | R_203257711080 |
| At1g05650 | 12a1      |           |                |
| At1g05660 | 12a1      | 12a       | R_102031203980 |
| At2g41850 | 23a2      | 23a       | R_203257711080 |
| At3g57510 | 23a1      | 23a       | R_203257711080 |
| At3g07970 |           |           |                |
| At1g80170 | 11b2      | 11b       | R_101123907580 |
| At1g02460 | 14a1      | 14a       | R_104000102440 |
| At4g01890 | 14a2      | 14a       | R_104000102440 |
| At1g48100 | 13a1      | 13a       | R_103319703610 |
| At1g56710 |           | 11a       | R_101071703180 |
| At3g26610 |           | 13a       | R_103103800590 |
| At5g14650 | 35b1      | 35b       | R_305000103160 |
| At1g10640 | 11a1      | 11a       | R_101071703180 |
| At1g60590 | 11a2      | 11a       | R_101071703180 |
| At5g39910 |           | 35x       | R_305230002200 |
| At3g15720 | 13b2      | 13b       | R_103352501880 |
| At5g17200 | 35b1      | 35b       | R_305000103160 |
| At4g35670 | 24a2      | 24a       | R_204067704020 |
| At5g27530 |           | 35w       | R_305033201380 |
| At5g44830 | 45a1      | 45a       | R_405128403640 |
| At5g44840 | 45a1      | 45a       | R_405128403640 |
| At1g80140 | 11b2      | 11b       | R_101123907580 |
| At4g32380 | 24x2      | 24e       | R_204153002470 |
| At4g32370 | 24x2      | 24e       | R_204153002470 |
| At1g23470 | 11d1      | 11b       | R_101123907580 |
| At1g23460 | 11d1      | 11b       | R_101123907580 |
| At1g70500 | 11d2      | 11b       | R_101123907580 |
| At1g19170 | 11c1      | 11b       | R_101123907580 |
| At3g42950 |           | 35y       | R_305275700510 |
| At4g33440 |           | 24a       | R_204067704020 |
| At2g23900 |           | 24e       | R_204153002470 |
| At3g48950 |           | 35z       | R_305323600240 |
| At3g61490 | 23a1      | 23a       | R_203257711080 |
| At4g23500 | 44a1      | 44a       | R_404077901550 |
| At4g23820 | 44a1      | 44a       | R_404077901550 |
| At5g41870 | 15a2      | 15a       | R_105428301090 |
| At3g62110 | 23a1      | 23a       | R_203257711080 |
| At3g16850 |           |           |                |
| At3g06770 |           | 35w       | R_305052001580 |
| At3g57790 | 23a1      | 23a       | R_203257711080 |
