# Supplementary material for: Patterns of expansion and expression divergence in the plant polygalacturonase gene family
Source: PubMed Central journal article supplement (PMC1794546; doi:10.1186/gb-2006-7-9-r87), 2006-09-29
Supplement: gb-2006-7-9-r87-S5.pdf [file gb-2006-7-9-r87-S5.pdf]

Supplement E. Primer pairs and conditions used to amplify PG genes

| Gene ID                             |                      | Primer Pair Sequence                                    | Annealing Temp. (°C) | # of Cycles |
|-------------------------------------|----------------------|---------------------------------------------------------|----------------------|-------------|
| Atlg02460                           | PG1F<br>PG1R         | TGATTGTGTATCGATTGGCTCC<br>CATTCCAACAAAACGGATCCA         | 62                   | 36          |
| Atlg02790                           | PG2F<br>PG2R         | AAGATTGGGTCAACAATCCG<br>CAGACAGCTTCACCTTTCCCG           | 62                   | 36          |
|                                     | PG2F-A<br>PG2R-A     | GCTCCAACAACGTAACCGTCGAA<br>CGAAGATAACATTGGCGTTATCGCA    | 64                   | 36          |
| Atlg05650                           | PG3F<br>PG3R         | AACTCCGCAAAAAGACGTGAT<br>GTTGGACGGACAATAGTTTTGG         | 62                   | 36          |
|                                     | PG3AF<br>PG3AR       | CAAAAACGGCGTGAGGATAA<br>TCCAGTTAAAGCTTCTTTCTCT          | 59                   | 36          |
| Atlg05660                           | PG4F<br>PG4R         | GAAGGAAGTAAAGAAGACGGAGTA<br>TCGGTTTAGACAACACTAGTAGGTTGA | 62                   | 36          |
| Atlg10640                           | PG5F<br>PG5R         | TGGGAGTTTTGGTGTGGAAAGT<br>TGCTATGGTCACAGTAGAATTGG       | 55 ( 62)             | 36          |
| Atlg17150                           | PG6F<br>PG6R         | GACCGGACATGGAATTAGTA<br>ACAATGCGGAGGAACCATCTT           | 62                   | 36          |
|                                     | PG6F-A<br>PG6R-A     | TGTGTTTCATGGCTTTTGGTTTGC<br>GGGACAATTATTGCTCTTCTGGCA    | 64                   | 36          |
| Atlg19170                           | PG7F<br>PG7R         | CGAGGATATGGTAATTGAGGA<br>TAGTCAATGTCCGCCACATT           | 62                   | 28          |
| Atlg23450                           | PG8F<br>PG8R         | GGTCTGGATGCCAAGGCTTTGTAT<br>AGTCTGGCAAAAACATCGAACA      | 62                   | 36          |
| Atlg23460                           | PG9F<br>PG9R         | GGTTTTGGAGTAAAAGCAAAGA<br>CAACTTTTGTTCACATGGACC         | 62                   | 36          |
|                                     | PG9F-A<br>PG9R-A     | CCAGCAATTGGGACTCAAAGTTC<br>TCCATGTCCAGGTCCACAATAGAT     | 64                   | 36          |
| Atlg23470                           | PG10F<br>PG10R       | GCGAAAGCCATCAAATTTGC<br>TGTTGTTACATGAAGAAAGCA           | 62                   | 36          |
|                                     | PG10F-A<br>PG10R-A   | TCAGCCATATAATGTACGGAACA<br>CACACGTGACAGACATATCAAACAA    | 64                   | 36          |
| Atlg43080                           | PG11F<br>PG11R       | ATTGACGTTGGAAAACCG<br>CAATGAAAAGTTGAGATTAGGA            | 62                   | 36          |
| Atlg43090<br>Atlg43100              | PG12-13F<br>PG12-13R | TTGATCAGAAGTATTGCCCTCACC<br>GGGTAAATGGAGGAAGCTCGA       | 62                   | 36          |
| Atlg43100                           | PG13F-A<br>PG13R-A   | CGAAAAGGAAAATTCTACCTCGGTG<br>ATGTCCAGGACCACACTTGACGTT   | 64                   | 36          |
| Atlg43080<br>Atlg43090<br>Atlg43100 | PG11-13F<br>PG11-13R | CGTGAACAACCTCAAGAAATCAAAGAC<br>CCTTCTCGAGTCCAGTATGCTTT  | 64                   | 36          |
| Atlg48100                           | PG14F<br>PG14R       | CCAGACGGATCATCATAGT<br>CGACAGAATTGTAATGCCAA             | 62                   | 36          |
| Atlg56710                           | PG15F<br>PG15R       | TTGTATCGCCCCGATGGAC<br>TGCGAATCTGAACATTGTGTG            | 62                   | 36          |
| Atlg60590                           | PG16F<br>PG16R       | AAACCGGTTGCTCCAATGTGT<br>TCCATTTCCGCTGGCTTT             | 62                   | 27          |
| Atlg65570                           | PG17F<br>PG17R       | ATAGCAACGGTTCTGTGGAG<br>CGTGAATTTGTTGGCCTTT             | 62                   | 36          |
|                                     | PG17F-A<br>PG17R-A   | CGCCGTTTGCTTAATACCTTGATTC<br>CAAGAACCGTAACATTGTGAACACC  | 64                   | 36          |
| Atlg70500                           | PG18F<br>PG18R       | CTCTGTTGCTCTGTTGATGG<br>CATCGAATTTTCGTCGATTT            | 62                   | 36          |
| Atlg78400                           | PG19F<br>PG19R       | TCCGGTTTTAGCTTAATTTTG<br>TCGCCAGTTGCTATGTCAA            | 62                   | 36          |
|                                     | PG19F-A<br>PG19R-A   | TCCAGATGATTGATGTCCAAAGCC<br>GGCGAGTGGAGATATCAACTTTTAC   | 64                   | 36          |
| Atlg80140                           | PG20F<br>PG20R       | GGAGGAACAGAGGTAACAGTGGGA<br>AGCAGTGACCGAAAAGGGA         | 62                   | 36          |
|                                     | PG20F-A<br>PG20F-A   | GGAATTGTCGATGATACATCTGTAA<br>ATTTGCCTTGGCCGTCAA         | 61                   | 36          |
| Atlg80170                           | PG21F<br>PG21R       | TGAACAATGTGTCAAACCCCA<br>ATGCAGATGTGATCCCGACT           | 62                   | 27          |
| At2g15450<br>At2g15460              | PG22F<br>PG22R       | CAATCGCTAATGATCTTTCATGTT<br>ACTTATCCTTTTGAAGCACGG       | 62                   | 36          |

| Gene ID   |                    | Primer Pair Sequence                                   | Annealing Temp. (°C) | # of Cycles |
|-----------|--------------------|--------------------------------------------------------|----------------------|-------------|
| At2g15470 | PG22F-A<br>PG22R-A | ACCGTTCATAGAGACAAGCTAACTC<br>TAGGACAATTGGGGTTTGTGTG    | 62                   | 36          |
| At2g23900 | PG25F<br>PG25R     | TGAAGTATCGCAGTGGTGGATTT<br>TGAAAGGAATCGTTCCTGAACCC     | 62                   | 36          |
| At2g26620 | PG26F<br>PG26R     | TTGGTATATGACAGAATGTGATTG<br>GTTAGGATTTGCAGGCGCTAAT     | 62                   | 36          |
|           | PG26F-A<br>PG26R-A | CTCTCTGGAACCACTAAACTCAATA<br>TTCTTAGCTCTAAATGTTCAACTGC | 61                   | 36          |
| At2g33160 | PG27F<br>PG27R     | AGATAGCCCTAATACCGACGGAAT<br>CATGAGAAGCATACTTCCAGGAC    | 62                   | 36          |
| At2g40310 | PG28F<br>PG28R     | CAGCTTCAAAAATCCTCGTTTCG<br>TCTTCAGATGAACCGGATTTATTG    | 62                   | 36          |
|           | PG28F-A<br>PG28R-A | GAGATGCTAACTCTATATAAGCTGA<br>GTCATTGAGTGGCCAAGATTGT    | 56                   | 36          |
| At2g41850 | PG29F<br>PG29R     | CCAAAAACGACAGCATTCTCT<br>CAGCTCCATTTGAAGAACATGC        | 62                   | 36          |
| At2g43860 | PG30F<br>PG30R     | CTACTGTCTTCATAAACCTTGCCCT<br>AGTCATGGAGCAATCGGGAC      | 60 (62)              | 36          |
|           | PG30F-A<br>PG30R-A | CCCATCTCATGTACCTTCTTCTACA<br>CTGGCTGTTGATCGACGTTAAA    | 61                   | 36          |
| At2g43870 | PG31F<br>PG31R     | ACTACTGTCCTGATCAGATTGTC<br>CTCCCTCCATGATTTACGAAA       | 62                   | 36          |
| At2g43880 | PG32F<br>PG32R     | TAATGGAAAAGGTTGTCCTCGC<br>CGGATGAATCTAAGGTTATAAAAAAC   | 62                   | 36          |
| At2g43890 | PG33F<br>PG33R     | ACTGCCCTAGTAATCAAGGTTGTC<br>AACTCGATCACAGAAGGCAA       | 62                   | 36          |
| At3g06770 | PG34F<br>PG34R     | TTGGCGGAAAAGTTCTTCA<br>GCTTGTTACCGTTGATCAAACCTCT       | 62                   | 36          |
| At3g07820 | PG35F<br>PG35R     | CCTCATCGACCAAGAGTACTGCC<br>TGCGGATTTGCCAAACATACATG     | 62                   | 36          |
|           | PG35F-A<br>PG35R-A | CATGCCAATCTTCGTCACCAA<br>CTTGAAGAGTGCAGTTGATGACCTT     | 64                   | 36          |
| At3g07830 | PG36F<br>PG36R     | GTTCAAAAATACGAGACGTGTAATT<br>CTTCTCGGTGTCGGAGATT       | 60 (55)              | 36          |
|           | PG36AF<br>PG36AR   | CATTTTGAGAATATCATCCTTAGA<br>CAAGAAATTGATTGGAAAAAGA     | 62 (55)              | 36          |
| At3g07840 | PG37F<br>PG37R     | ACGGCTAAAAAATTATACGAATGT<br>ACCAAGCTTGAACCTCACCTTT     | 60 (55)              | 36          |
|           | PG37AF<br>PG37AR   | CCGCCTCTGGTATTCATTTTGA<br>GATTGAAACATCTTTCATTGCCAA     | 62 (55)              | 36          |
| At3g07850 | PG38F<br>PG38R     | TCACGTATAGGCCCAATTAGATAA<br>CACAACTTCTTCCATGCAG        | 62                   | 36          |
|           | PG38F-A<br>PG38R-A | ACAATGTTAGCCTTCCCGTTCTCA<br>GCGAATCCACACAACAATFACTACC  | 64                   | 36          |
| At3g07970 | PG39F<br>PG39R     | AAAGCTTGGGAAGCAGCTTGT<br>TTTGAAGATTTTGGCCACC           | 62                   | 36          |
| At3g14040 | PG40F<br>PG40R     | TAGCCTTCCCCTTCTCATCGACCA<br>TGCAATGAATGTTGGGTGCAACAA   | 62                   | 36          |
|           | PG40F-A<br>PG40R-A | ACCCAAAATATTGAGACTTAAACTTC<br>ACCAAATACTCACCTTTTGGCAC  | 60                   | 36          |
| At3g15720 | PG41F<br>PG41R     | GGGAAATGGAACCAAAAACATC<br>ACAAAAACAGGGGTGGATTTGC       | 65                   | 36          |
|           | PG41F-A<br>PG41R-A | TTCTTCACATTGTCTTCCCCTG<br>AACGACAAACTGCCCATCTCCT       | 62                   | 36          |
| At3g16850 | PG42F<br>PG42R     | GCAATAATGCCATCTGCAAGGA<br>TCAAACCTTCTGTACCGCTTTCCA     | 62                   | 36          |
| At3g26610 | PG43F<br>PG43R     | TGGAAGGCAGCTTGTAAAAGTG<br>TTGGTTTCATTGGTGGAT           | 62                   | 36          |
| At3g42950 | PG44F<br>PG44R     | GACGTTTCTCTCTTCTCACAAA<br>CAACATCTCTAAGATTCTGTCCA      | 62                   | 36          |
| At3g48950 | PG45F-A<br>PG45R-A | CCGTACTTGATCGAGATCTTGTTT<br>TCGAGACTCGCTGACATTGTAACA   | 62                   | 36          |
| At3g57510 | PG46F<br>PG46R     | AGGACAAAATGCGAAGACCAA<br>AAGAAGCAATGCATGTAGTACAA       | 62                   | 27          |
| At3g59850 | PG47F<br>PG47R     | TGGCAACGAAAATTGCCCTA<br>CCGTAATATATATGAAAATACGACC      | 60(62)               | 36          |

| Gene ID          |                              | Primer Pair Sequence                                                     | Annealing Temp. (°C) | # of Cycles |
|------------------|------------------------------|--------------------------------------------------------------------------|----------------------|-------------|
| At3g61490        | PG48F-A<br>PG48R-A           | ACGGCAAGACGCTAAACACAAA<br>ACGGGCGAGTGTATTAGCTT                           | 62                   | 36          |
| At3g62110        | PG49F<br>PG49R               | TCCTGGTACAGGCCTTCTATG<br>TCTTCTACCGGCAATTCTCTT                           | 62                   | 36          |
| At4g01890        | PG50F<br>PG50R               | TAGGACCCGGAGCATAACGATACGATA<br>GGATTCCGATTTGAGACACGAG                    | 62                   | 36          |
| At4g13760        | PG51F<br>PG51R               | TTAGTGTGCGGAAGCTTAGGGAA<br>TCTATGCTCGAACTATTTTCTAG                       | 62                   | 36          |
|                  | PG51F-A<br>PG51R-A           | GCATCCCAATTTTCAGTTGTT<br>ATCAAGTGTACCGGAACCAGA                           | 60                   | 36          |
| At4g18180        | PG52F<br>PG52R               | AGGGAGATATCCAAATGAGAAAAG<br>CGTTAAACACGAACCAAAATTTAA                     | 62                   | 36          |
|                  | PG52F-A<br>PG52R-A           | GGCGGTAAAAGAAACGGTAACT<br>CAAGGACCAGAGAATCTGAGAGAA                       | 62                   | 36          |
| At4g23500        | PG53F<br>PG53R               | TTTCTCCTGATAGTGCCGTTGA<br>TCCCGATATTCCAGCTAACTGA                         | 62                   | 36          |
| At4g23820        | PG54F<br>PG54R               | GTCATCCATCACGTTACGATCTTAG<br>TAGTTCTCAGCTCCGGACACG                       | 62                   | 36          |
| At4g32370        | PG55F<br>PG55R               | TCGGGGTCGCCAAAAATATA<br>CGCTGGAGGTTTAGCATAGTATACA                        | 62                   | 36          |
| At4g32380        | PG56F                        | TTCCCATCATCATCGATCA<br>GCTCACATCAGGAAACAATATTAC                          | 62                   | 36          |
| At4g33440        | PG57F<br>PG57R               | AATGTGGTGGGAGTTATGGTGGAA<br>TCGCTGAGTGATCATTGAGCCA                       | 62                   | 36          |
| At4g35670        | PG58F<br>PG58R               | TACGGACATCACACTCGTTAACAC<br>GGCAGCAAATTCTGTGACTGTA                       | 62                   | 36          |
| At5g14650        | PG59F<br>PG59R               | TCAATTCAAACGGGATGCTCG <sup>1</sup><br>TGTCTTCAGTTCACCGTGTGC <sup>1</sup> | 62                   | 36          |
|                  | PG59F-A<br>PG59R-A           | TGCTCTGTTCTAAACGAAAGTAAT<br>AGGAAGGAAACAGGTCCAACAA                       | 58                   | 36          |
|                  | PG59F-B<br>PG59R-B           | CGTAAGTAAAGATGTTGATGTCAATT<br>CGATTTTCTCTTTACATTCTTTTCCC                 | 60                   | 36          |
| At5g17200        | PG60F<br>PG60R               | TCGTTTGGCATTGTTAAATACG<br>AGACTTGCATGGACCGATGAAT                         | 62                   | 36          |
| At5g27530        | PG61F<br>PG61R               | TGGACAAGGTTATGCAAGAAACA<br>CCGCCACTGAAAGACTATTACTAT                      | 62                   | 36          |
| At5g39910        | PG62F<br>PG62R               | GATGCTCCAGTTTATTCTCT<br>ACAAGGGCCATGAAACTCAA                             | 58                   | 36          |
|                  | PG62F-A<br>PG62R-A           | CCAATCCGTTACATACAGTCATACA<br>GTGTCTTCCCATGCATCTTTGA                      | 62                   | 36          |
| At5g41870        | PG63F<br>PG63R               | GACCGTTTTAAGCTAAGAGAAGG<br>GCTGATATATCTTCGTCCAGGA                        | 61                   | 36          |
|                  | PG63F-A<br>PG63R-A           | CAAAGTGTAGTTATGGGCTTGC<br>ATCTTCGTCCAGGATGCTCC                           | 63                   | 36          |
|                  | PG63F-B<br>PG63R-B           | TTTCTTCGTCCGTGCCATTACT<br>TGAGTCCGTCTCCGTGAATAAA                         | 62                   | 36          |
| At5g44830        | PG64F<br>PG64R               | CTCCATTCTGTTCTTGTAATGGC<br>TTGTTCCCGAACCATTGACT                          | 62                   | 36          |
|                  | PG64F-A<br>PG64R-A           | CATCAGCACCCAATGGTACAT<br>CGACCAAGCTGCTTTGTTAA                            | 60                   | 36          |
| At5g44840        | PG65F<br>PG65R               | GGGATACGCAAAAAATATAC<br>CTATCCGTACAACCTCTTCAGT                           | 53                   | 36          |
|                  | PG65F-A<br>PG65R-A           | CATTTTAGTTTTCAATGTCAATGGC<br>GTAATACCATTTCATCCGGCAC                      | 62                   | 36          |
| At5g48140        | PG66F<br>PG66R               | ATCGTGATGATGGGTCCATGCAA<br>ACAAGCAGCAGAAGGCCATGTCTT                      | 67                   | 36          |
| <b>At3g57790</b> | <b>PG67F</b><br><b>PG67R</b> | <b>TGATGCAATCTGTCCCAAGA</b><br><b>TCCGTTTGGTGAACCTGATA</b>               | <b>62</b>            | <b>36</b>   |
|                  | Oligo(T) 18                  | TTTTTTTTTTTTTTTTTT                                                       |                      |             |

<sup>1</sup>amplifies two bands from cDNAs

Unless indicated otherwise, annealing temperature was 62°C and 36 cycles of PCR was carried out.
