# Supplementary material for: Patterns of expansion and expression divergence in the plant polygalacturonase gene family
Source: PubMed Central journal article supplement (PMC1794546; doi:10.1186/gb-2006-7-9-r87), 2006-09-29
Supplement: gb-2006-7-9-r87-S6.pdf [file gb-2006-7-9-r87-S6.pdf]

## SUPPLEMENT F. Summary of expression tags

### I. List of cDNAs for Arabidopsis PGs

A list of cDNAs accession numbers were the SIGNAL database [49]. The accessions were used to retrieve cDNA sequences from GenBank. A BLAST search was conducted with Arabidopsis PG predicted cDNA sequences as queries and SIGNAL cDNA sequences as subjects. The top matches were inspected and assigned to Arabidopsis PGs.

| Gene name | Count | Accession                              |
|-----------|-------|----------------------------------------|
| At4g33440 | 2     | BT002785, BT004354                     |
| At3g62110 | 2     | AF324992, BT000724                     |
| At3g06770 | 2     | AY093030, AY128935                     |
| At1g02790 | 3     | AY065210, AY133812, AF428425           |
| At4g23500 | 1     | AY142497                               |
| At5g14650 | 1     | BT005780                               |
| At1g10640 | 2     | AY039852, AY143959                     |
| At1g80170 | 2     | AY046002, AY142668                     |
| At2g41850 | 1     | AY078936                               |
| At4g23820 | 2     | AY128793, AY062697                     |
| At1g19170 | 2     | BT000031, AY081277                     |
| At5g48140 | 1     | BT009687                               |
| At3g42950 | 2     | AY050383, AY143967                     |
| At3g14040 | 2     | AY114635, AY062447                     |
| At3g57510 | 1     | BT005376                               |
| At3g07820 | 2     | AY096534, AY065239                     |
| At3g07830 | 1     | BT005245                               |
| At3g16850 | 2     | AY035074, AY113876                     |
| At1g60590 | 2     | AY060568, BT000611                     |
| At1g48100 | 3     | AY096360, AY050798, AF410319           |
| At3g57790 | 4     | AY065080, BT003366, AY136461, BT001251 |
