# Supplementary material for: Patterns of expansion and expression divergence in the plant polygalacturonase gene family
Source: PubMed Central journal article supplement (PMC1794546; doi:10.1186/gb-2006-7-9-r87), 2006-09-29
Supplement: gb-2006-7-9-r87-S7.pdf [file gb-2006-7-9-r87-S7.pdf]

### Supplement G. Patterns of gene expression during abscission

| Gene      | Clades | Cluster | Block    |
|-----------|--------|---------|----------|
| <b>7B</b> |        |         |          |
| At2g43870 | A3     | 2b      | 23a      |
| At1g19170 | B8     |         | 11c      |
| At2g23900 | B6     |         | 24e'     |
| At3g06770 | B1     |         |          |
| At3g42950 | B8     |         | 35y      |
| At3g48950 | B6     |         | 35z      |
| At4g33440 | B4     |         | 24a'     |
| At5g48140 | A1d    |         | 35v      |
| <b>7C</b> |        |         |          |
| At2g43860 | A3     | 2b      | 23a      |
| At1g70500 | A14    |         | 11d      |
| At2g33160 | A1a    |         | 12a      |
| At3g07820 | A1d    | 3a      | 35v      |
| At3g26610 | A9     |         | 13w      |
| At4g32370 | A2     | 4a      | 24e      |
| At5g27530 | A5     |         | 35w      |
| <b>7D</b> |        |         |          |
| At1g02460 | A11    |         | 14a      |
| At1g56710 | A10    |         | 11a'     |
| At3g61490 | B6     |         | 23a      |
| <b>7E</b> |        |         |          |
| At1g10640 | A6     |         | 11a/11a' |
| At1g23460 | A14    | 1b      | 11d      |
| <b>7F</b> |        |         |          |
| At1g80170 | A4     | 1d      | 11b      |
| At3g16850 | B1     |         |          |
| At4g23820 | B3     |         | 44a      |
| At1g02790 | A1d    |         | 14a      |
| At1g48100 | A13    |         | 13a      |
| At1g60590 | A6     |         | 11a      |
| At3g07850 | A1d    | 3a      | 35v      |
| At3g62110 | B2     |         | 23a      |
| At4g23500 | B6     |         | 44a      |
| At3g57510 | A15    |         | 23a      |
| <b>7G</b> |        |         |          |
| At1g05650 | A3     | 1a      | 12a      |

|           |    |    |     |
|-----------|----|----|-----|
| At1g05660 | A3 | 1a | 12a |
| At1g65570 | A3 |    |     |
| At4g35670 | A5 |    | 24a |
| At5g17200 | A5 |    | 35b |
| At5g41870 | B3 |    | 15a |

7H

|           |    |  |     |
|-----------|----|--|-----|
| At3g59850 | A3 |  | 23a |
|-----------|----|--|-----|

7I

|           |     |    |     |
|-----------|-----|----|-----|
| At2g41850 | A15 |    | 23a |
| At2g43890 | A3  | 2b | 23a |
| At2g43880 | A3  | 2b | 23a |
| At3g07970 | A15 |    |     |

7J

|           |     |    |     |
|-----------|-----|----|-----|
| At4g01890 | A11 |    | 14a |
| At4g32380 | A2  | 4a | 24e |
